# Supplementary material for: MON2 Guides Wntless Transport to the Golgi through Recycling Endosomes
Source: PubMed Central journal article supplement (PMC10511057; doi:10.1247/csf.20012), 2020-05-12

# Supplemental Figure S3

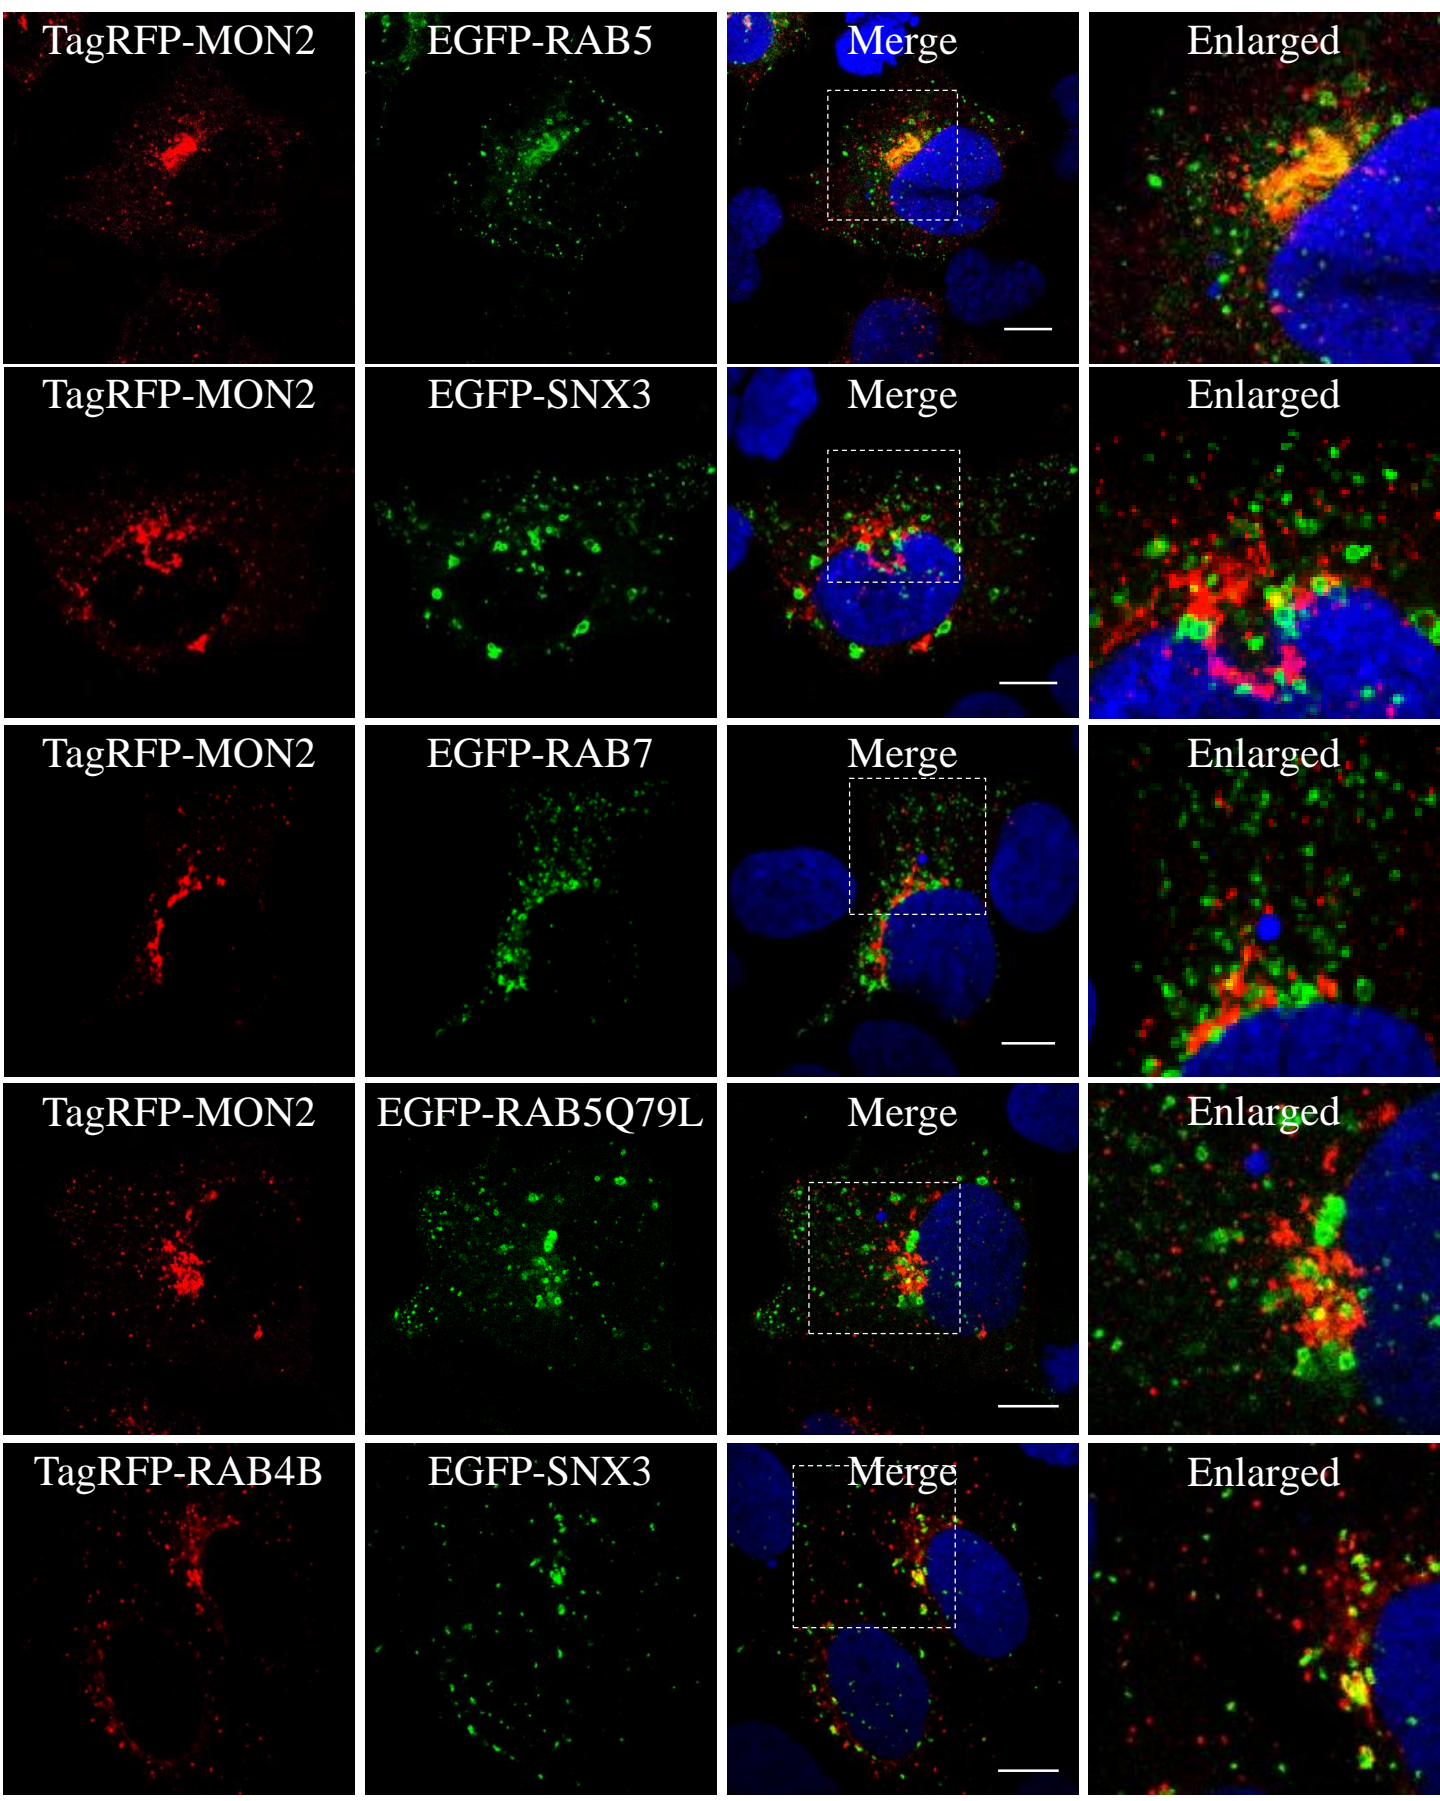

Supplement: csf_45_20012_3.pdf [file csf_45_20012_3.pdf]
